# Supplementary material for: Inhibitory Mechanisms of Lekethromycin in Dog Liver Cytochrome P450 Enzymes Based on UPLC-MS/MS Cocktail Method
Source: MDPI journal article supplement (doi:10.3390/molecules28207193), 2023-10-20
Supplement: s1 [file s1]

## Supplementary Materials

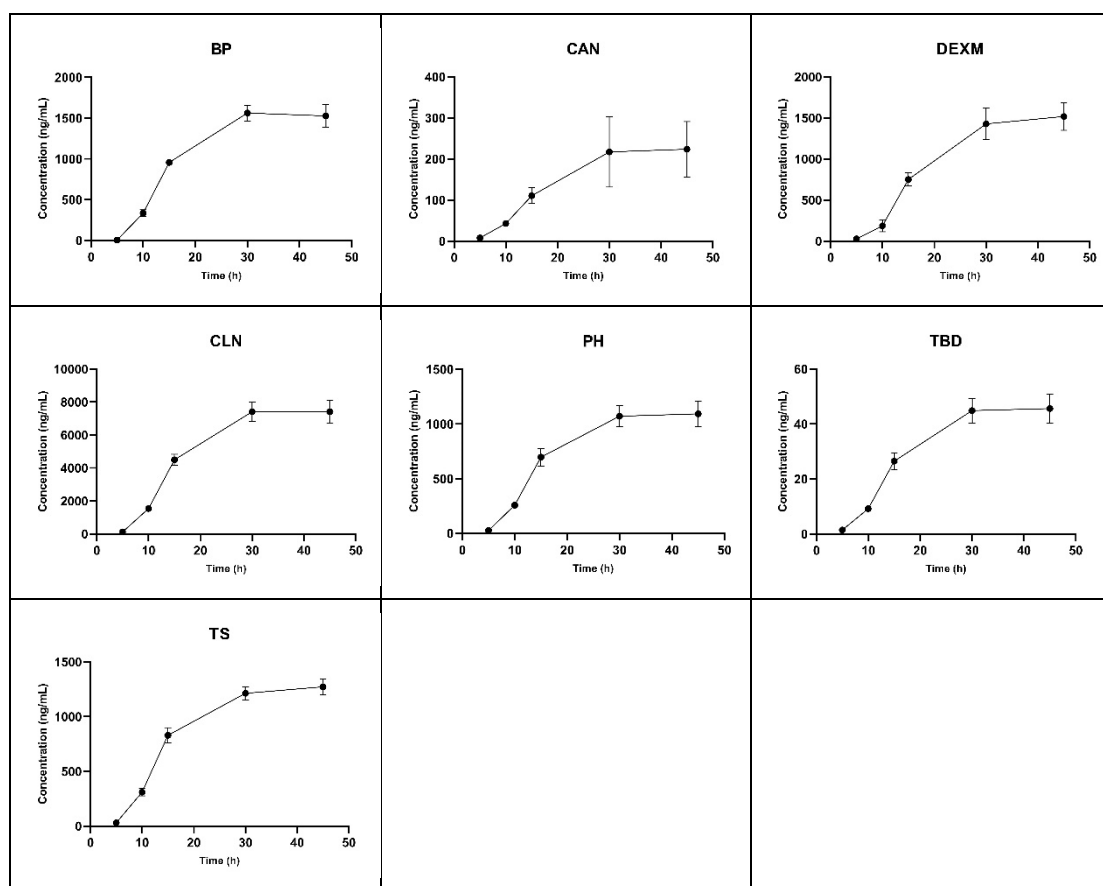

**Figure S1.** Optimized incubation time of bupropion (BP), coumarin (CAN), chlorzoxazone (CLN), dextromethorphan (DEXM), phenacetin (PH), tolbutamide (TBD), and testosterone (TS) in dog liver microsomes. Data are presented as mean $\pm$ SD (n=3).

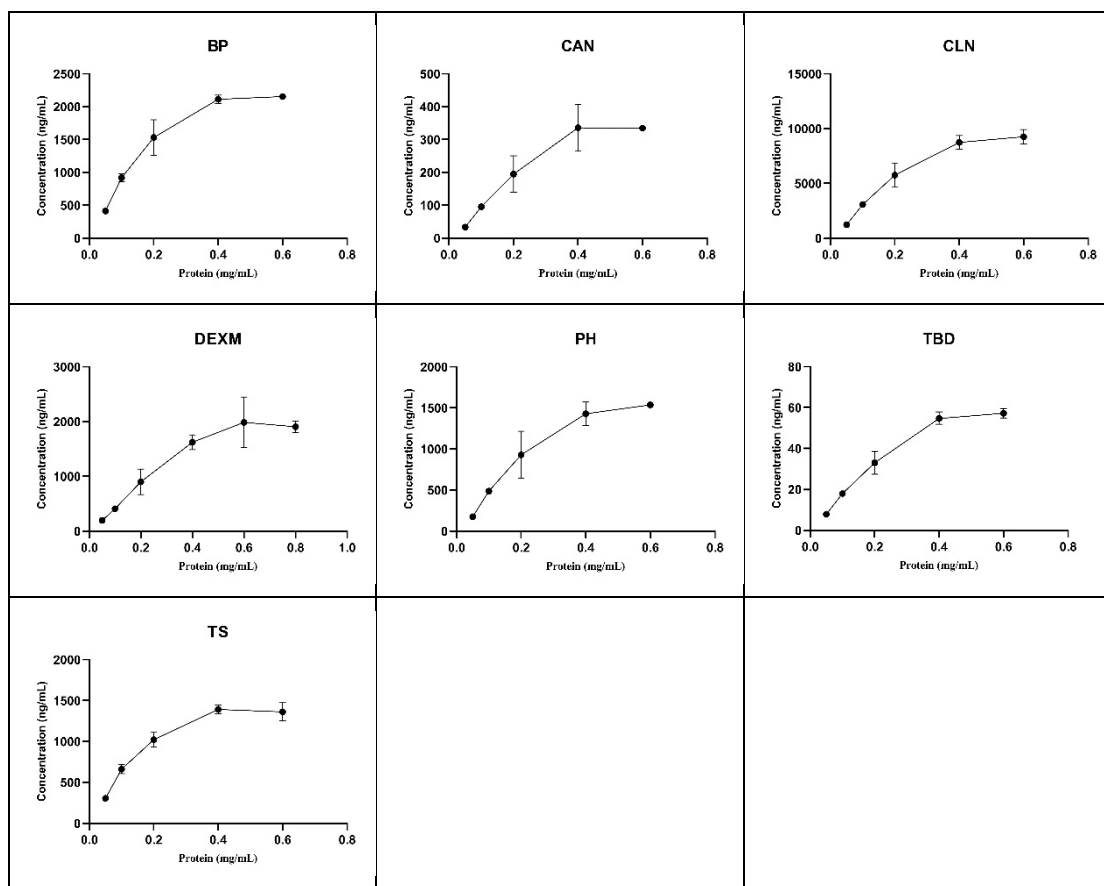

**Figure S2.** Optimized protein concentration of bupropion (BP), coumarin (CAN), chlorzoxazone (CLN), dextromethorphan (DEXM), phenacetin (PH), tolbutamide (TBD), and testosterone (TS) in dog liver microsomes. Data are presented as mean±SD (n=3).

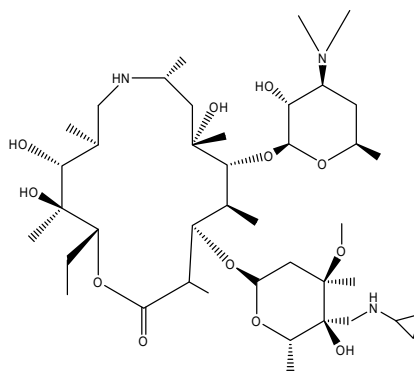

**Figure S3.** The structure of lekethromycin with molecule weight of 804.5 ( $C_{41}H_{77}N_3O_{12}$ )
